# Supplementary material
Source: Springer Nature journal article supplement (https://www.springermedizin.de/resource/supplementary/12877_2014_1048_MOESM11_ESM.pdf/9440702)
Supplement: MOESM11 [file 9440702]

[Additional file 1] A list as the data assessment of SPBC (70) for study 32 countries

| Countries      | 2010 (A) † |      |       | 1980 (B) ‡ |        |         | SPBC (70) ± |      |       |
|----------------|------------|------|-------|------------|--------|---------|-------------|------|-------|
|                | Female     | Male | Total | Female     | Male   | Total   | Female      | Male | Total |
| Japan          | 14631      | 2473 | 17103 | 383540     | 299372 | 682912  | 381         | 83   | 250   |
| Canada         | 1805       | 372  | 2177  | 74706      | 62642  | 137348  | 242         | 59   | 158   |
| Iceland        | 15         | 5    | 20    | 665        | 627    | 1292    | 226         | 80   | 155   |
| France         | 5959       | 934  | 6893  | 257715     | 190525 | 448240  | 231         | 49   | 154   |
| Australia      | 968        | 230  | 1198  | 47118      | 38903  | 86021   | 205         | 59   | 139   |
| U.S.A          | 16403      | 3290 | 19693 | 843024     | 631777 | 1474801 | 195         | 52   | 134   |
| Spain          | 2474       | 614  | 3088  | 147872     | 111746 | 259618  | 167         | 55   | 119   |
| Italy          | 4661       | 968  | 5629  | 273638     | 213501 | 487139  | 170         | 45   | 116   |
| Switzerland    | 433        | 94   | 528   | 30419      | 22911  | 53330   | 142         | 41   | 99    |
| United Kingdom | 3949       | 691  | 4640  | 297202     | 226439 | 523640  | 133         | 31   | 89    |
| Sweden         | 582        | 118  | 700   | 45268      | 38897  | 84165   | 129         | 30   | 83    |
| Denmark        | 301        | 59   | 360   | 25350      | 20692  | 46042   | 119         | 29   | 78    |
| Luxembourg     | 15         | 3    | 18    | 1342       | 966    | 2308    | 114         | 28   | 78    |
| Netherlands    | 632        | 98   | 730   | 56049      | 42468  | 98517   | 113         | 23   | 74    |
| Portugal       | 427        | 96   | 522   | 40076      | 30398  | 70474   | 106         | 31   | 74    |
| Belgium        | 548        | 79   | 626   | 49186      | 36685  | 85871   | 111         | 21   | 73    |
| Austria        | 455        | 76   | 531   | 45534      | 28576  | 74110   | 100         | 27   | 72    |
| Germany        | 5015       | 684  | 5700  | 495622     | 298265 | 793887  | 101         | 23   | 72    |
| Norway         | 213        | 43   | 256   | 20015      | 16354  | 36369   | 106         | 26   | 70    |
| Finland        | 223        | 41   | 264   | 23934      | 15034  | 38968   | 93          | 27   | 68    |
| Ireland        | 113        | 20   | 133   | 12181      | 11115  | 23297   | 92          | 18   | 57    |
| Poland         | 919        | 243  | 1163  | 140938     | 101952 | 242890  | 65          | 24   | 48    |
| Lithuania      | 76         | 30   | 106   | 14477      | 8182   | 22659   | 53          | 37   | 47    |
| Estonia        | 39         | 11   | 50    | 7550       | 3830   | 11381   | 52          | 29   | 44    |
| Belarus        | 194        | 38   | 232   | 44364      | 20912  | 65276   | 44          | 18   | 36    |
| Hungary        | 249        | 67   | 316   | 56485      | 41433  | 97918   | 44          | 16   | 32    |
| Latvia         | 49         | 8    | 58    | 12764      | 6884   | 19648   | 39          | 12   | 29    |
| Slovakia       | 79         | 25   | 104   | 20587      | 16369  | 36956   | 39          | 15   | 28    |
| Bulgaria       | 117        | 54   | 170   | 35729      | 31835  | 67564   | 33          | 17   | 25    |
| Czech Republic | 195        | 47   | 241   | 55505      | 40013  | 95517   | 35          | 12   | 25    |
| Russia         | 1975       | 291  | 2266  | 661607     | 265041 | 926648  | 30          | 11   | 24    |
| Ukraine        | 641        | 109  | 749   | 264466     | 123511 | 387977  | 24          | 9    | 19    |

†: The number of aged 100 in 2010

‡: The number of people aged 70 years in 1980

±: (A) / (B) \*10000
